# Supplementary material for: CNN-Based Device-Agnostic Feature Extraction From ONH OCT Scans
Source: PubMed Central journal article supplement (PMC11620008; doi:10.1167/tvst.13.12.5), 2024-12-03
Supplement: tvst-13-12-5_s002.pdf [file tvst-13-12-5_s002.pdf]

Supplementary Table S1: Validation performance of the model separated by device. Dice Similarity Coefficient (DSC) during validation in 5-fold cross-validation. Note that validation performance was used as criterion for early stopping of the model training.

|                               | <b>Overall</b>    | <b>Cirrus</b>     | <b>1000 MKI</b>   | <b>1000 MKII</b>  | <b>3D-OCT 2000</b> | <b>Spectralis</b> |
|-------------------------------|-------------------|-------------------|-------------------|-------------------|--------------------|-------------------|
|                               | Mean DSC $\pm$ SD | Mean DSC $\pm$ SD | Mean DSC $\pm$ SD | Mean DSC $\pm$ SD | Mean DSC $\pm$ SD  | Mean DSC $\pm$ SD |
| RNFL                          | 0.845 $\pm$ 0.08  | 0.779 $\pm$ 0.08  | 0.842 $\pm$ 0.06  | 0.846 $\pm$ 0.06  | 0.854 $\pm$ 0.05   | 0.891 $\pm$ 0.07  |
| Vessels                       | 0.483 $\pm$ 0.27  | 0.228 $\pm$ 0.20  | 0.496 $\pm$ 0.21  | 0.491 $\pm$ 0.17  | 0.454 $\pm$ 0.21   | 0.697 $\pm$ 0.20  |
| Vessels + RNFL                | 0.870 $\pm$ 0.08  | 0.808 $\pm$ 0.09  | 0.863 $\pm$ 0.06  | 0.876 $\pm$ 0.06  | 0.887 $\pm$ 0.05   | 0.908 $\pm$ 0.07  |
| Bruch's membrane <sup>a</sup> | 0.575 $\pm$ 0.21  | 0.497 $\pm$ 0.15  | 0.488 $\pm$ 0.14  | 0.469 $\pm$ 0.13  | 0.427 $\pm$ 0.13   | 0.773 $\pm$ 0.15  |
| BMO <sup>b,c</sup>            | 0.732 $\pm$ 0.40  | 0.659 $\pm$ 0.42  | 0.791 $\pm$ 0.37  | 0.669 $\pm$ 0.43  | 0.644 $\pm$ 0.43   | 0.863 $\pm$ 0.30  |
| Lamina Cribrosa <sup>b</sup>  | 0.176 $\pm$ 0.22  | 0.138 $\pm$ 0.21  | 0.127 $\pm$ 0.12  | 0.062 $\pm$ 0.12  | 0.075 $\pm$ 0.12   | 0.249 $\pm$ 0.24  |
| PPA Alpha <sup>b</sup>        | 0.036 $\pm$ 0.11  | 0.012 $\pm$ 0.07  | 0.005 $\pm$ 0.01  | 0.006 $\pm$ 0.02  | 0.069 $\pm$ 0.13   | 0.039 $\pm$ 0.12  |
| PPA Beta <sup>b</sup>         | 0.238 $\pm$ 0.26  | 0.158 $\pm$ 0.19  | 0.094 $\pm$ 0.16  | 0.155 $\pm$ 0.17  | 0.135 $\pm$ 0.19   | 0.369 $\pm$ 0.30  |
| PPA Gamma <sup>b</sup>        | 0.069 $\pm$ 0.16  | 0.077 $\pm$ 0.15  | 0.000 $\pm$ 0.00  | 0.023 $\pm$ 0.07  | 0.026 $\pm$ 0.07   | 0.105 $\pm$ 0.22  |

<sup>a</sup> Including PPA Alpha and PPA Beta. <sup>b</sup> If label present in either of the annotations. <sup>c</sup> Bruch's Membrane Opening, defined by absence of Bruch's membrane on enface projection

Supplementary Table S2: Concordance between grader segmentations and model in one-to-one comparisons of all grader pairs, and the model versus each grader. Dice Similarity Coefficients (DSC) is averaged over all annotated B-scans. A total of 40 B-scans were compared for each device (8 eyes, 5 B-scans per eye) annotated by 4 different graders.

|      | <b>Cirrus</b>     |                   | <b>3D-OCT 2000</b> |                   | <b>Spectralis</b> |                   |
|------|-------------------|-------------------|--------------------|-------------------|-------------------|-------------------|
|      | Inter-grader      | Model vs graders  | Inter-grader       | Model vs graders  | Inter-grader      | Model vs graders  |
|      | Mean DSC $\pm$ SD | Mean DSC $\pm$ SD | Mean DSC $\pm$ SD  | Mean DSC $\pm$ SD | Mean DSC $\pm$ SD | Mean DSC $\pm$ SD |
| RNFL | 0.759 $\pm$ 0.07  | 0.807 $\pm$ 0.06  | 0.807 $\pm$ 0.08   | 0.846 $\pm$ 0.06  | 0.792 $\pm$ 0.11  | 0.826 $\pm$ 0.08  |

|                               |              |              |              |              |              |              |
|-------------------------------|--------------|--------------|--------------|--------------|--------------|--------------|
| Vessels                       | 0.288 ± 0.17 | 0.175 ± 0.16 | 0.359 ± 0.20 | 0.370 ± 0.22 | 0.600 ± 0.14 | 0.582 ± 0.17 |
| Vessels + RNFL                | 0.805 ± 0.08 | 0.846 ± 0.07 | 0.851 ± 0.07 | 0.882 ± 0.06 | 0.848 ± 0.10 | 0.862 ± 0.07 |
| Bruch's membrane <sup>a</sup> | 0.332 ± 0.17 | 0.438 ± 0.20 | 0.363 ± 0.16 | 0.463 ± 0.16 | 0.319 ± 0.19 | 0.456 ± 0.21 |
| BMO <sup>b,c</sup>            | 0.670 ± 0.38 | 0.674 ± 0.36 | 0.720 ± 0.37 | 0.674 ± 0.40 | 0.901 ± 0.17 | 0.919 ± 0.12 |
| Lamina Cribrosa <sup>b</sup>  | 0.086 ± 0.16 | 0.059 ± 0.12 | 0.108 ± 0.19 | 0.018 ± 0.06 | 0.118 ± 0.16 | 0.117 ± 0.15 |
| PPA Alpha <sup>b</sup>        | 0.018 ± 0.08 | 0.001 ± 0.01 | 0.059 ± 0.16 | 0.031 ± 0.09 | 0.058 ± 0.13 | 0.008 ± 0.02 |
| PPA Beta <sup>b</sup>         | 0.111 ± 0.18 | 0.011 ± 0.06 | 0.156 ± 0.20 | 0.134 ± 0.19 | 0.174 ± 0.21 | 0.165 ± 0.21 |
| PPA Gamma <sup>b</sup>        | 0.023 ± 0.06 | 0.000 ± 0.00 | 0.038 ± 0.12 | 0.001 ± 0.00 | 0.129 ± 0.20 | 0.000 ± 0.00 |

<sup>a</sup> Including PPA Alpha and PPA Beta. <sup>b</sup> If label present in either of the annotations. <sup>c</sup> Bruch's Membrane Opening, defined by absence of Bruch's membrane on enface projection

Supplementary Table S3. Concordance of cpRNFL thickness measurements, comparing manufacturers proprietary output.

|                         | Manufacturers                          |                                                                                 |                                                       |
|-------------------------|----------------------------------------|---------------------------------------------------------------------------------|-------------------------------------------------------|
|                         | Cirrus vs. 3D-OCT 2000<br>ICC (95% CI) | Cirrus vs. 3D-OCT 2000 vs. Spectralis<br>Mean of absolute differences ± SD (µm) | Cirrus vs. 3D-OCT 2000 vs. Spectralis<br>ICC (95% CI) |
| cpRNFL @ 3.4mm,<br>mean | 0.590 (-0.079 – 0.901)                 | 8.16 ± 3.91                                                                     | NA                                                    |
| 12 hour quartile        | 0.770 (0.238 – 0.949)                  | 7.13 ± 5.03                                                                     | NA                                                    |
| 3 hour quartile         | 0.427 (-0.155 – 0.837)                 | 12.25 ± 6.00                                                                    | NA                                                    |
| 6 hour quartile         | 0.795 (0.053 – 0.960)                  | 8.50 ± 6.05                                                                     | NA                                                    |
| 9 hour quartile         | 0.716 (0.113 – 0.936)                  | 10.38 ± 4.27                                                                    | NA                                                    |
| cpRNFL @ 3.5mm,<br>mean | NA                                     | NA                                                                              | NA                                                    |

|                   |    |    |    |
|-------------------|----|----|----|
| 12 hour quartile  | NA | NA | NA |
| 3 hour quartile   | NA | NA | NA |
| 6 hour quartile   | NA | NA | NA |
| 9 hour quartile   | NA | NA | NA |
| Temporal-superior | NA | NA | NA |
| Nasal-superior    | NA | NA | NA |
| Nasal             | NA | NA | NA |
| Inferior-nasal    | NA | NA | NA |
| Inferior-temporal | NA | NA | NA |
| temporal          | NA | NA | NA |

cpRNFL=circumpapillary retinal nerve fiber layer; ICC=intraclass correlation coefficient; CI=confidence interval; NA=not applicable

Supplementary Table S4. Concordance of cup volume and BMO surface measurements, comparing manufacturers proprietary output.

|                         | <b>Manufacturers</b>  |                                                         |                       |                                                         |                            |                                                         |                                       |
|-------------------------|-----------------------|---------------------------------------------------------|-----------------------|---------------------------------------------------------|----------------------------|---------------------------------------------------------|---------------------------------------|
|                         | Cirrus vs 3D-OCT 2000 |                                                         | Cirrus vs. Spectralis |                                                         | 3D-OCT 2000 vs. Spectralis |                                                         | Cirrus vs. 3D-OCT 2000 vs. Spectralis |
|                         | ICC (95% CI)          | Mean of absolute differences $\pm$ SD ( $\mu\text{m}$ ) | ICC (95% CI)          | Mean of absolute differences $\pm$ SD ( $\mu\text{m}$ ) | ICC (95% CI)               | Mean of absolute differences $\pm$ SD ( $\mu\text{m}$ ) | ICC (95% CI)                          |
| Cup volume <sup>a</sup> | 0.993 (0.923 – 0.999) | 0.010 $\pm$ 0.011 <sup>b</sup>                          | NA                    | NA                                                      | NA                         | NA                                                      | NA                                    |

|             |                           |                            |                           |                            |                           |                            |                          |
|-------------|---------------------------|----------------------------|---------------------------|----------------------------|---------------------------|----------------------------|--------------------------|
| BMO surface | 0.584 (-0.072 –<br>0.913) | 0.291 ± 0.126 <sup>c</sup> | 0.576 (-0.193 –<br>0.900) | 0.230 ± 0.154 <sup>c</sup> | 0.322 (-0.221 –<br>0.790) | 0.299 ± 0.284 <sup>c</sup> | 0.487 (0.083 –<br>0.841) |
|-------------|---------------------------|----------------------------|---------------------------|----------------------------|---------------------------|----------------------------|--------------------------|

BMO=Bruch's membrane opening; CNN=convolutional neural network; ICC=intraclass correlation coefficient; CI=confidence interval; NA=not applicable; <sup>a</sup> 2 out of 8 eyes had no cup below the BMO plane, resulting in a value of 0. <sup>b</sup> Expressed in mm<sup>3</sup>. <sup>c</sup> Expressed in mm<sup>2</sup>.

Supplement table S5. Concordance of cpRNFL thickness measurements, comparing manufacturers proprietary output to the CNN output within devices.

|                      | Manufacturer vs. CNN   |                                                         |                        |                                                         |                        |                                                         |
|----------------------|------------------------|---------------------------------------------------------|------------------------|---------------------------------------------------------|------------------------|---------------------------------------------------------|
|                      | Cirrus                 |                                                         | 3D-OCT 2000            |                                                         | Spectralis             |                                                         |
|                      | ICC (95% CI)           | Mean of absolute differences $\pm$ SD ( $\mu\text{m}$ ) | ICC (95% CI)           | Mean of absolute differences $\pm$ SD ( $\mu\text{m}$ ) | ICC (95% CI)           | Mean of absolute differences $\pm$ SD ( $\mu\text{m}$ ) |
| cpRNFL @ 3.4mm, mean | 0.815 (0.301 – 0.960)  | 4.62 $\pm$ 2.32                                         | 0.916 (0.668 – 0.982)  | 3.31 $\pm$ 2.30                                         | NA                     | NA                                                      |
| 12 hour quartile     | 0.531 (-0.286 – 0.888) | 9.94 $\pm$ 6.00                                         | 0.678 (-0.082 – 0.932) | 8.90 $\pm$ 6.48                                         | NA                     | NA                                                      |
| 3 hour quartile      | 0.777 (0.211 – 0.951)  | 5.61 $\pm$ 5.00                                         | 0.747 (0.155 – 0.944)  | 6.45 $\pm$ 6.86                                         | NA                     | NA                                                      |
| 6 hour quartile      | 0.971 (0.870 – 0.994)  | 3.07 $\pm$ 2.10                                         | 0.919 (0.642 – 0.983)  | 6.20 $\pm$ 2.51                                         | NA                     | NA                                                      |
| 9 hour quartile      | 0.897 (0.571 – 0.979)  | 4.48 $\pm$ 2.72                                         | 0.967 (0.847 – 0.993)  | 3.62 $\pm$ 2.55                                         | NA                     | NA                                                      |
| cpRNFL @ 3.5mm, mean | NA                     | NA                                                      | NA                     | NA                                                      | 0.873 (-0.038 – 0.981) | 4.23 $\pm$ 1.83                                         |
| 12 hour quartile     | NA                     | NA                                                      | NA                     | NA                                                      | NA                     | NA                                                      |
| 3 hour quartile      | NA                     | NA                                                      | NA                     | NA                                                      | NA                     | NA                                                      |
| 6 hour quartile      | NA                     | NA                                                      | NA                     | NA                                                      | NA                     | NA                                                      |
| 9 hour quartile      | NA                     | NA                                                      | NA                     | NA                                                      | NA                     | NA                                                      |
| Temporal-superior    | NA                     | NA                                                      | NA                     | NA                                                      | 0.914 (0.515 – 0.983)  | 6.77 $\pm$ 5.24                                         |
| Nasal-superior       | NA                     | NA                                                      | NA                     | NA                                                      | 0.929 (0.703 – 0.985)  | 6.75 $\pm$ 5.13                                         |
| Nasal                | NA                     | NA                                                      | NA                     | NA                                                      | 0.916 (-0.009 – 0.988) | 6.86 $\pm$ 3.20                                         |
| Inferior-nasal       | NA                     | NA                                                      | NA                     | NA                                                      | 0.972 (0.854 – 0.994)  | 5.75 $\pm$ 4.25                                         |
| Inferior-temporal    | NA                     | NA                                                      | NA                     | NA                                                      | 0.812 (0.134 – 0.962)  | 7.65 $\pm$ 4.82                                         |
| temporal             | NA                     | NA                                                      | NA                     | NA                                                      | 0.806 (-0.028 – 0.970) | 8.01 $\pm$ 2.30                                         |

CNN=convolutional neural network; cpRNFL=circumpapillary retinal nerve fiber layer; ICC=intraclass correlation coefficient; CI=confidence interval; NA=not applicable

Supplementary Table S6. Concordance of BMO-MRW measurements, comparing manufacturers proprietary output to the CNN output within devices

|                         | Manufacturer vs. CNN   |                                                         |                        |                                                         |                        |                                                         |
|-------------------------|------------------------|---------------------------------------------------------|------------------------|---------------------------------------------------------|------------------------|---------------------------------------------------------|
|                         | Cirrus                 |                                                         | 3D-OCT 2000            |                                                         | Spectralis             |                                                         |
|                         | ICC (95% CI)           | Mean of absolute differences $\pm$ SD ( $\mu\text{m}$ ) | ICC (95% CI)           | Mean of absolute differences $\pm$ SD ( $\mu\text{m}$ ) | ICC (95% CI)           | Mean of absolute differences $\pm$ SD ( $\mu\text{m}$ ) |
| BMO-MRW, mean           | NA                     | NA                                                      | NA                     | NA                                                      | 0.983 (0.917 – 0.997)  | 13.69 $\pm$ 8.79                                        |
| 12 hour quartile        | NA                     | NA                                                      | NA                     | NA                                                      | NA                     | NA                                                      |
| 3 hour quartile         | NA                     | NA                                                      | NA                     | NA                                                      | NA                     | NA                                                      |
| 6 hour quartile         | NA                     | NA                                                      | NA                     | NA                                                      | NA                     | NA                                                      |
| 9 hour quartile         | NA                     | NA                                                      | NA                     | NA                                                      | NA                     | NA                                                      |
| Temporal-superior       | NA                     | NA                                                      | NA                     | NA                                                      | 0.717 (-0.047 – 0.942) | 44.93 $\pm$ 32.22                                       |
| Nasal-superior          | NA                     | NA                                                      | NA                     | NA                                                      | 0.709 (0.006 – 0.937)  | 58.17 $\pm$ 55.09                                       |
| Nasal                   | NA                     | NA                                                      | NA                     | NA                                                      | 0.986 (0.915 – 0.997)  | 14.19 $\pm$ 13.20                                       |
| Inferior-nasal          | NA                     | NA                                                      | NA                     | NA                                                      | 0.571 (-0.047 – 0.891) | 77.08 $\pm$ 84.66                                       |
| Inferior-temporal       | NA                     | NA                                                      | NA                     | NA                                                      | 0.788 (0.169 – 0.955)  | 39.77 $\pm$ 27.46                                       |
| temporal                | NA                     | NA                                                      | NA                     | NA                                                      | 0.968 (0.864 – 0.993)  | 15.62 $\pm$ 14.17                                       |
| Cup volume <sup>a</sup> | 0.680 (0.019 – 0.927)  | 0.057 $\pm$ 0.065 <sup>b</sup>                          | 0.713 (0.088 – 0.935)  | 0.046 $\pm$ 0.059 <sup>b</sup>                          | NA                     | NA                                                      |
| BMO surface             | 0.136 (-0.163 – 0.622) | 0.434 $\pm$ 0.322 <sup>c</sup>                          | 0.275 (-0.397 – 0.787) | 0.251 $\pm$ 0.135 <sup>c</sup>                          | 0.483 (-0.133 – 0.861) | 0.204 $\pm$ 0.217 <sup>c</sup>                          |

BMO=Bruch's membrane opening; MRW=minimal rim width; CNN=convolutional neural network; ICC=intraclass correlation coefficient; CI=confidence interval; NA=not applicable; <sup>a</sup> 2 out of 8 eyes had no cup below the BMO plane, resulting in a value of 0. <sup>b</sup> Expressed in mm<sup>3</sup>. <sup>c</sup> Expressed in mm<sup>2</sup>.

Supplementary Table S7. Concordance of cup volume and BMO surface measurements, comparing CNN output between manufacturers.

---

**CNN**

---

|                         | Cirrus vs 3D-OCT 2000   |                                       | Cirrus vs. Spectralis   |                                       | 3D-OCT 2000 vs. Spectralis |                                       | Cirrus vs. 3D-OCT 2000 vs. Spectralis |
|-------------------------|-------------------------|---------------------------------------|-------------------------|---------------------------------------|----------------------------|---------------------------------------|---------------------------------------|
|                         | ICC (95% CI)            | Mean of absolute differences $\pm$ SD | ICC (95% CI)            | Mean of absolute differences $\pm$ SD | ICC (95% CI)               | Mean of absolute differences $\pm$ SD | ICC (95% CI)                          |
| Cup volume <sup>a</sup> | 0.990 (0.950 – 0.998)   | 0.006 $\pm$ 0.006 <sup>b</sup>        | NA                      | NA                                    | NA                         | NA                                    | NA                                    |
| BMO surface             | -0.078 (-0.465 – 0.536) | 0.277 $\pm$ 0.325 <sup>c</sup>        | -0.133 (-0.587 – 0.534) | 0.278 $\pm$ 0.328 <sup>c</sup>        | 0.953 (0.745 – 0.991)      | 0.049 $\pm$ 0.020 <sup>c</sup>        | 0.062 (-0.191 – 0.552)                |

BMO=Bruch's membrane opening; CNN=convolutional neural network; ICC=intraclass correlation coefficient; CI=confidence interval; NA=not applicable; <sup>a</sup>2 out of 8 eyes had no cup below the BMO plane, resulting in a value of 0. <sup>b</sup> Expressed in mm<sup>3</sup>. <sup>c</sup> Expressed in mm<sup>2</sup>.
